# Supplementary material for: Chitosan-g-poly(acrylic acid)-bentonite composite: a potential immobilizing agent of heavy metals in soil
Source: Springer Nature journal article supplement (doi:10.1007/s10570-018-1828-x), 2018-05-11
Supplement: MOESM1 [file 15758286]

Supplementary Information for:

**Chitosan-g-poly(acrylic acid)-bentonite composite: a potential immobilizing agent of heavy metals in soil**

**P. Kumararajaa,b, K. M. Manjaiaha, S.C.Dattaa, T.P.Ahammed Shabeerc and Binoy Sarkard,e**

*aDivision of Soil Science and Agricultural Chemistry, ICAR-Indian Agricultural Research Institute, New Delhi, India*

*bICAR-Central Institute of Brackishwater Aquaculture, Chennai, Tamil Nadu, India*

*cICAR-National Research Centre for Grapes, Pune, Maharashtra, India*

*dDepartment of Animal and Plant Sciences, The University of Sheffield, Sheffield, S10 2TN, UK*

*eFuture Industries Institute, University of South Australia, Mawson Lakes, SA 5095, Australia*

SI Table 1: Comparison of metal adsorption capacities of chitosan bentonite composites

| Material | Metal | Adsorption capacity (mg g-1) | Reference |
| --- | --- | --- | --- |
| Chitosan-montmorillonite beads | Cu | 100 | Pereira *et al.* 2013 |
| Cross-linked chitosan/Al13-pillared montmorillonite | Cu | 53.3 | Duan *et al.* 2014 |
| PMAA/ grafted chitosan-bentonite | Cd | 83 | Abdel Khalek *et al.* 2012 |
| Chitosan/vermiculite bio composite | Cd | 58.5 | Chen *et al.* 2018 |
| Chitosan-clay composite | Ni | 32.4 | Futalan *et al.* 2011 |
| Chitosan immobilized bentonite | Ni | 18.7 | Tirtom *et al.* 2012 |
| Chitosan-GLA | Zn | 37.7 | Kamari *et al.* 2011 |
| Chitosan-AA-bentonite composite | Zn  Cu  Ni  Cd | 73.0  88.5  48.5  51.6 | Present study |

**References**

Abdel KMA, Mahmoud GA, El-Kelesh NA (2012) Synthesis and characterization of poly-methacrylic acid grafted chitosan-bentonite composite and its application for heavy metals recovery. Chem Mater Res 2: 1–12

Chen L, Wu P, Chen M, Lai X, Ahmed Z, Zhu N, Dang Z, Bi Y, Liu T (2018) Preparation and characterization of the eco-friendly chitosan/vermiculite biocomposite with excellent removal capacity for cadmium and lead. Appl Clay Sci /doi.org/10.1016/j.clay.2017.12.050

Duan L, Hu N, Wang T, Wang H, Ling L, Sun Y, Xie X (2016) Removal of copper and lead from aqueous solution by adsorption onto cross-linked chitosan/montmorillonite nanocomposites in the presence of hydroxyl–aluminum oligomeric cations: equilibrium, kinetic, and thermodynamic studies. Chem Eng Comm 203(1): 28-36

Futalan CM, Kan CC, Dalida ML, Hsien KJ, Pascua C, Wan MW (2011) Comparative and competitive adsorption of copper, lead, and nickel using chitosan immobilized on bentonite. Carbohyd Polym 83: 528-536

Kamari A, Pulford ID, Hargreaves JSJ (2011a) Binding of heavy metal contaminants onto chitosans—an evaluation for remediation of metal contaminated soil and water. J Environ Manag 92:2675–2682

Pereira FAR, Sousa KS, Cavalkanti GRS, Fonseca MG, Antonio GS,  [Alves](http://www.sciencedirect.com/science/article/pii/S0141813013004418) APM (2013) Chitosan-montmorillonite biocomposite as an adsorbent for copper (II) cations from aqueous solutions. Int J Biol Macromolecules 61: 471–478

Tirtom VN, Dinçer A, Becerik S, Aydemir T, Çelik A (2012) Comparative adsorption of Ni(II) and Cd(II) ions on epichlorohydrin crosslinked chitosan–clay composite beads in aqueous solution. Chem Eng J 197:379-386.
